# Supplementary material for: Pre-diabetes, diabetes and fluctuations of glucose tolerance after gestational diabetes mellitus: 5-year follow-up of a contemporary, prospective study in Germany
Source: PubMed Central journal article supplement — BMJ Open Diabetes Res Care. 2022 Mar 3;10(2):e002621. doi: 10.1136/bmjdrc-2021-002621 (PMC8895937; doi:10.1136/bmjdrc-2021-002621), 2022-03-03
Supplement: bmjdrc-2021-002621supp001.pdf [file bmjdrc-2021-002621supp001.pdf]

**Supplementary Table 1:** Results of valid OGTTs at 1 through 5 years post-partum (p.p.).

|                | 1 year p.p. |     | 2 years p.p. |     | 3 years p.p. |     | 4 years p.p. |     | 5 years p.p. |     |
|----------------|-------------|-----|--------------|-----|--------------|-----|--------------|-----|--------------|-----|
|                | n           | %   | n            | %   | n            | %   | n            | %   | n            | %   |
| <b>total</b>   | 197         | 100 | 112          | 100 | 108          | 100 | 90           | 100 | 128          | 100 |
| <b>NGT</b>     | 124         | 63  | 67           | 60  | 60           | 56  | 49           | 54  | 80           | 63  |
| <b>IGT</b>     | 23          | 12  | 10           | 9   | 13           | 12  | 10           | 11  | 14           | 11  |
| <b>IFG</b>     | 31          | 16  | 26           | 23  | 27           | 25  | 21           | 23  | 23           | 18  |
| <b>IFG+IGT</b> | 12          | 6   | 7            | 6   | 7            | 6   | 8            | 9   | 11           | 9   |
| <b>T2D</b>     | 7           | 3   | 2            | 2   | 1            | 1   | 2            | 2   | 0            | 0   |
